# Supplementary material for: Simultaneous detection and differentiation of common foodborne pathogens using tri-metallic magnetic microspheres as an aluminium foil based SERS substrate
Source: Royal Society of Chemistry journal article supplement (doi:10.1039/d5ay00529a), 2025-01-01

# Simultaneous Detection and Differentiation of Common Foodborne Pathogens using Tri-Metallic Magnetic Microspheres as an Aluminium Foil based SERS Substrate

Dev Kumar<sup>1</sup>, Anil K Yadav<sup>1\*</sup>, Swati Rani<sup>1</sup>, Pawan Kumar<sup>1</sup>, Anjali Malik<sup>2</sup>, Sachin Gupta<sup>3</sup>

<sup>1</sup>Department of Physics, Chaudhary Charan Singh University, Meerut-250004 India

<sup>2</sup>Department of Microbiology, Chaudhary Charan Singh University, Meerut-250004 India

<sup>3</sup>Department of Physics, Bennett University, Greater Noida 201310, India

\* Corresponding author: anilphy@ccsuniversity.ac.in

## Supporting information

Figure S1. Schematic representation of synthesis procedure of tri-metallic magnetic microspheres.

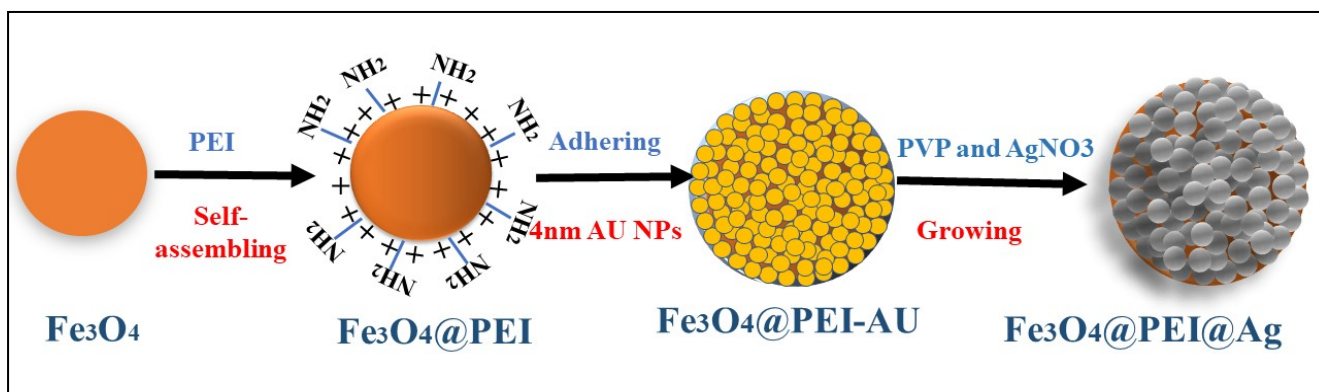

Figure S2. (a) The SERS spectra of R6G dye with different concentrations. (b) Calibration curve for R6G detection ( $R^2 = 0.97$ ).

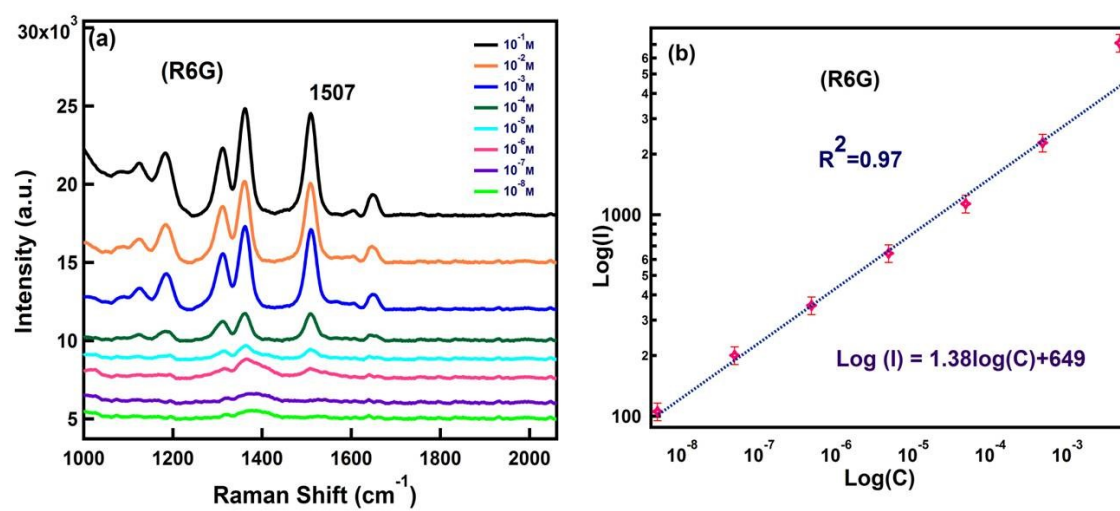

Supplement: d5ay00529a1.pdf [file d5ay00529a1.pdf]
